# Supplementary material
Source: publisher figshare collection journal article supplement (https://acs.figshare.com/ndownloader/files/5823273)
Supplement: Supplementary file 1 [file 5823273]

## Supporting Information

*Substrate-determined shape ...*

*A. Budkowski et al., Jagellonian University*

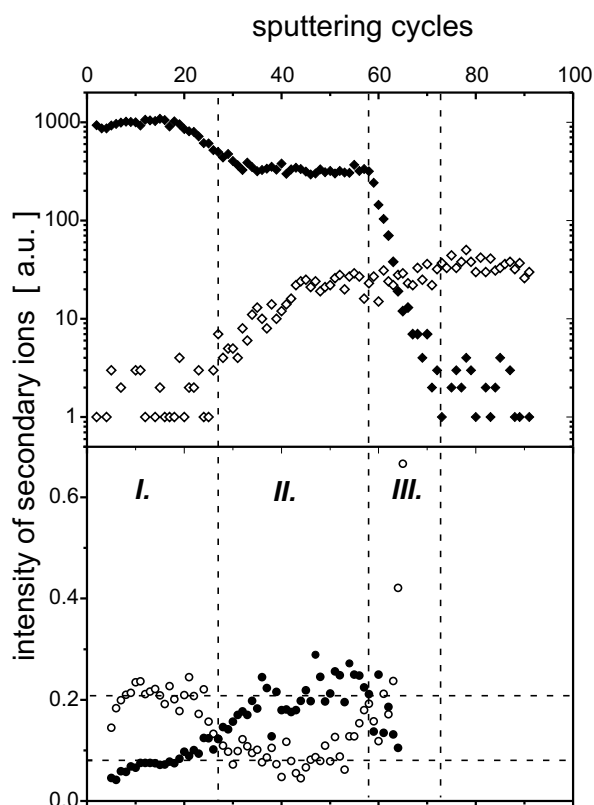

**Fig. S1.** Vertical domain structure of the dPS<sub>2</sub>/PI<sub>1</sub> film on CH<sub>3</sub>-SAM as determined with profiling dSIMS mode (1 cycle ~ 3.5 nm). Symbols, dashed lines and sputtering periods as in Fig. 5. Note, that identical vertical domain structure was determined for the dPS<sub>2</sub>/PI<sub>1</sub> on COOH-SAM (cf. Fig. 5) and for dPS<sub>2</sub>/PI<sub>2</sub> on SiO<sub>x</sub> (cf. Fig. S2)

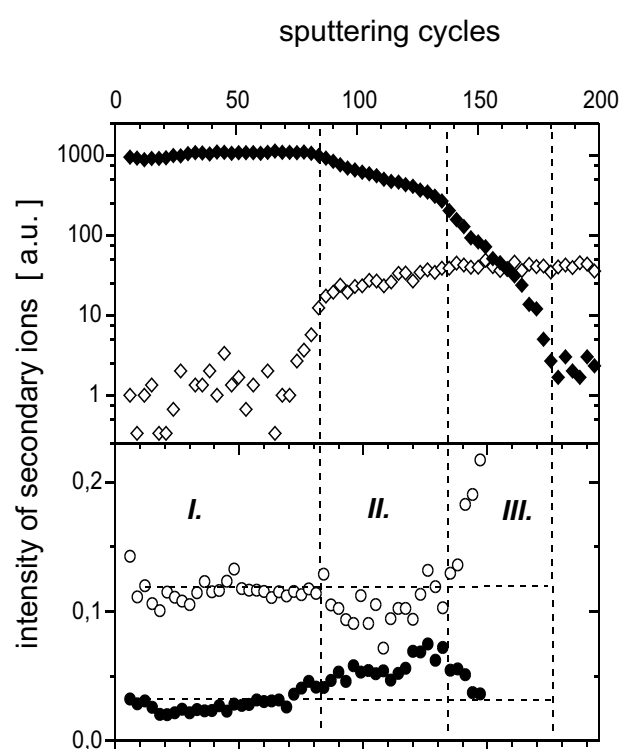

**Fig. S2.** As Fig. S1 but for the dPS<sub>2</sub>/PI<sub>2</sub> film on SiO<sub>x</sub> (1 cycle ~ 1.3 nm). The profile of total polymer composition (solid diamonds) is modified, especially in the second sputtering period. This is due to larger polydispersity of the protrusions and height distribution of the upper protrusion regions (exhibiting here both concave and convex shapes).

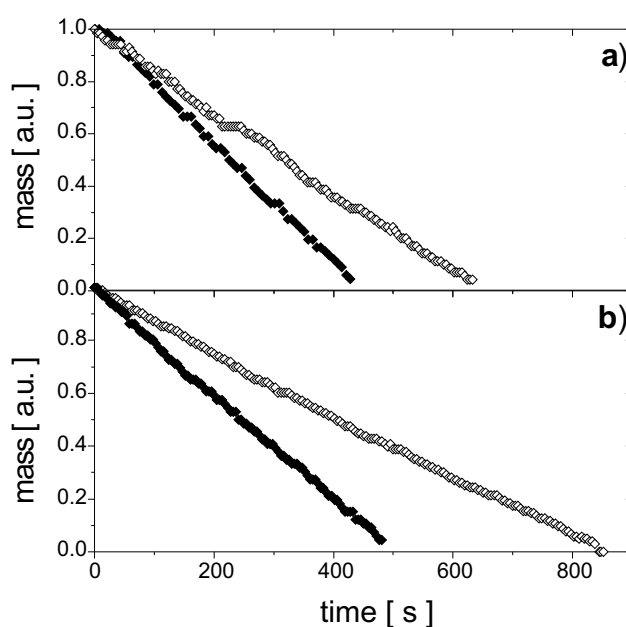

**Fig. S3.** Normalized weight of drying model layers plotted versus evaporation time. The layers composed of PS<sub>1</sub> (a), PI<sub>1</sub> (b) dissolved in toluene were cast onto CH<sub>3</sub>-SAM (open diamonds) and COOH-SAM (solid diamonds). Stronger substrate effect (cf. Fig. 6(a)-(b)) was obtained for modified ambient conditions [56].
